# Supplementary material for: Reaction-based conjugated polymer fluorescent probe for mercury(ii): good sensing performance with “turn-on” signal output
Source: Royal Society of Chemistry journal article supplement (doi:10.1039/c7py00035a), 2017-01-01
Supplement: c7py00035a1.pdf [file c7py00035a1.pdf]

Electronic Supplementary Information (ESI)

# Reaction-Based Conjugated Polymer Fluorescent Probe for Mercury(II): Good Sensing Performance with “Turn-on” Signal Output

Jun Ding,<sup>a</sup> Huiyang Li,<sup>a</sup> Yujun Xie,<sup>a</sup> Qian Peng,<sup>b</sup> Qianqian Li,<sup>a</sup> and Zhen Li<sup>a\*</sup>

<sup>a</sup> Department of Chemistry, Hubei Key Lab on Organic and Polymeric Opto-Electronic Materials, Wuhan University, Wuhan 430072, China

Corresponding author. Phone: 86-27-62254108; Fax: 86-27-68755363;

E-mail: [lizhen@whu.edu.cn](mailto:lizhen@whu.edu.cn) or [lichemlab@163.com](mailto:lichemlab@163.com).

<sup>b</sup> Key Laboratory of Organic Solids, Beijing National Laboratory For Molecular Science, Institute of Chemistry, Institute of Chemistry, Chinese Academy of Sciences, 100190 Beijing, China.

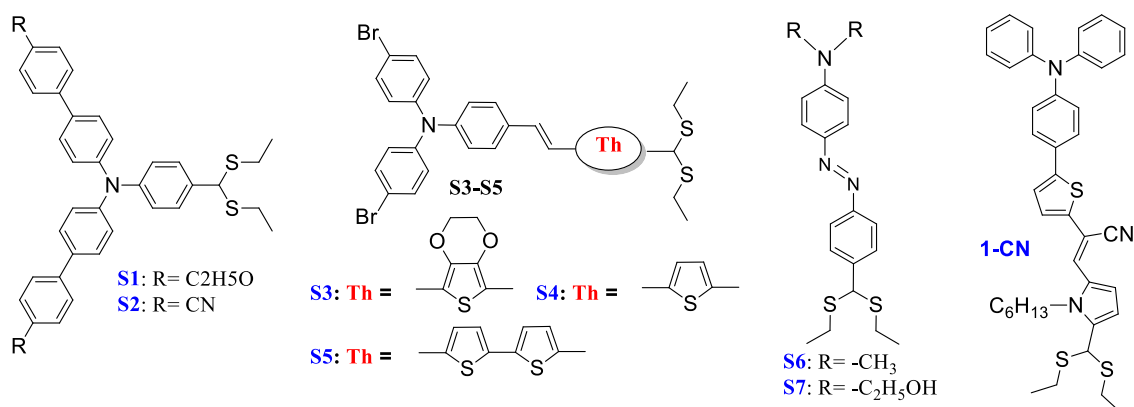

Chart S1. Different chemical  $\text{Hg}^{2+}$  sensors designed in our group.

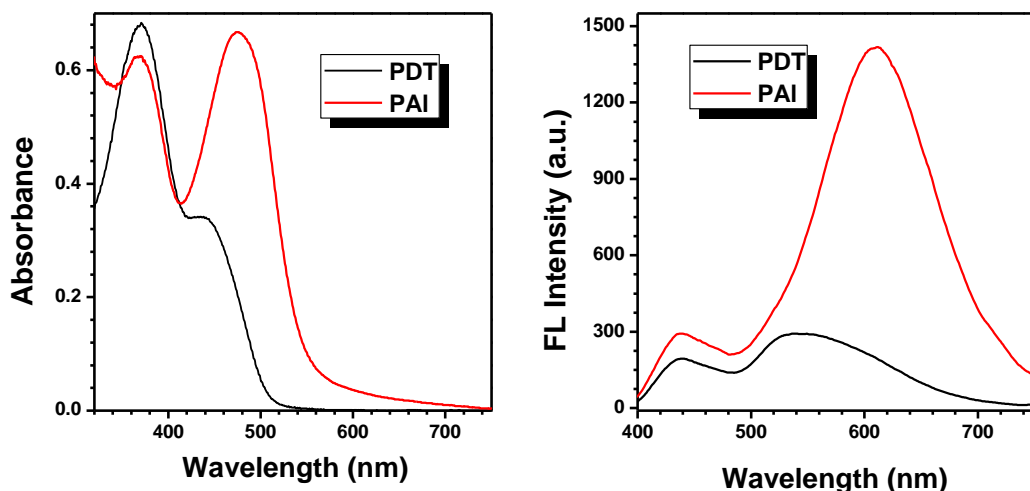

Figure S1. The UV-vis absorption (Left), fluorescent emission (Right) spectra of PAI and PDT in THF.

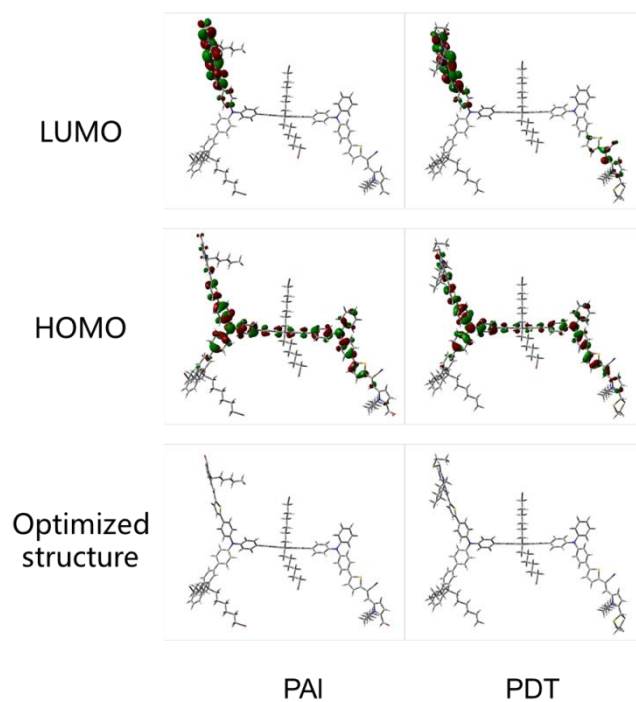

**Figure S2.** Frontier molecular orbitals optimized at the B3LYP/6-31G\* level of theory and electronic cloud distribution in dimers of **PAI** and **PDT**.

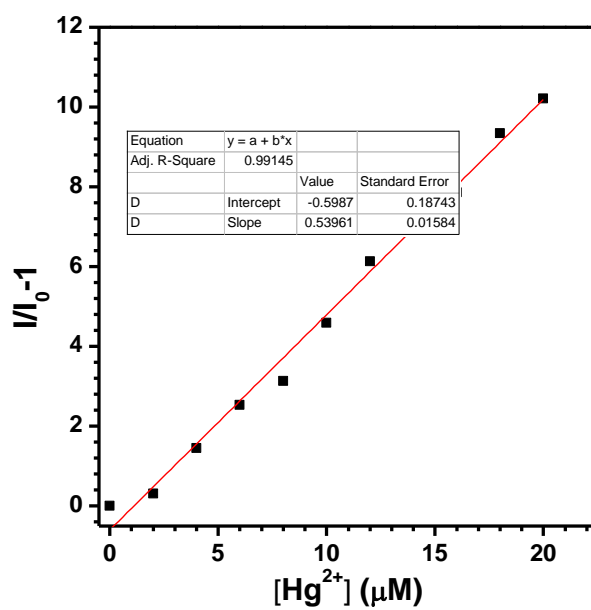

**Figure S3.** Fluorescence intensity of **PDT** in THF at 610 nm versus concentrations of  $\text{Hg}^{2+}$ .

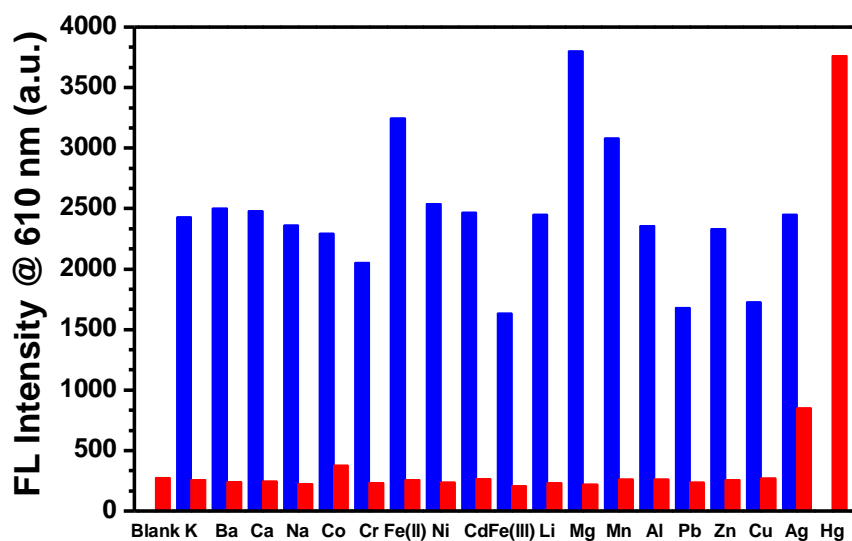

**Figure S4.** Fluorescence intensity at 610 nm of **PDT**(5  $\mu$ M) upon the addition of various metal ions (blue bar: **PDT** with other metals, red bar: **PDT** with  $\text{Hg}^{2+}$  (10  $\mu$ M) and other metals (50  $\mu$ M)).

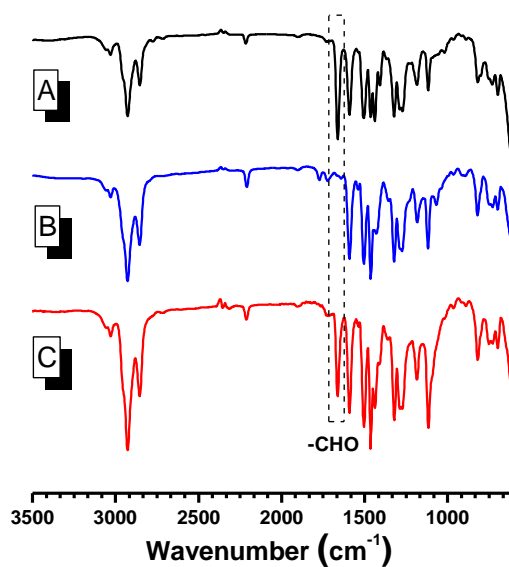

**Figure S5.** FTIR spectra of **A** (**PAI**), **B** (**PDT**), and **C** (**PDT** in presence of excess  $\text{Hg}^{2+}$ ).

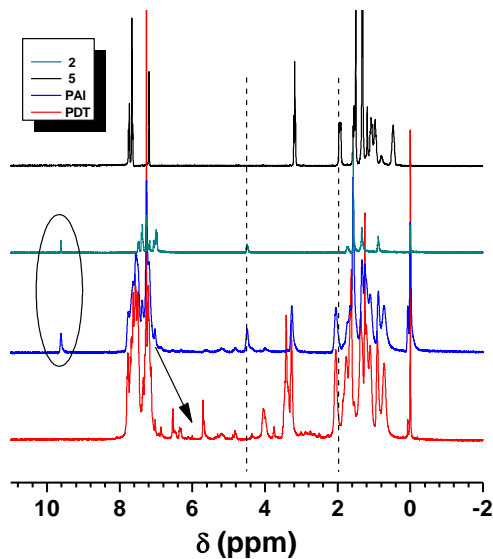

**Figure S6.**  $^1\text{H}$  NMR spectra of **2**, **5**, PAI and PDT.

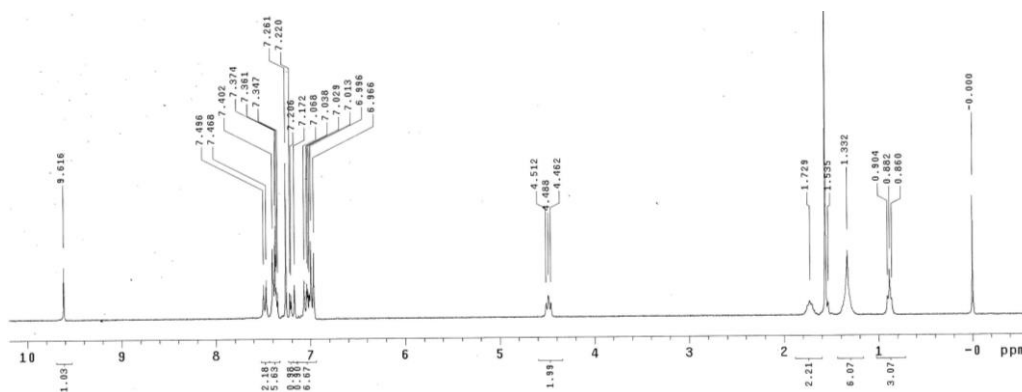

**Figure S7.**  $^1\text{H}$  NMR spectrum of **2**

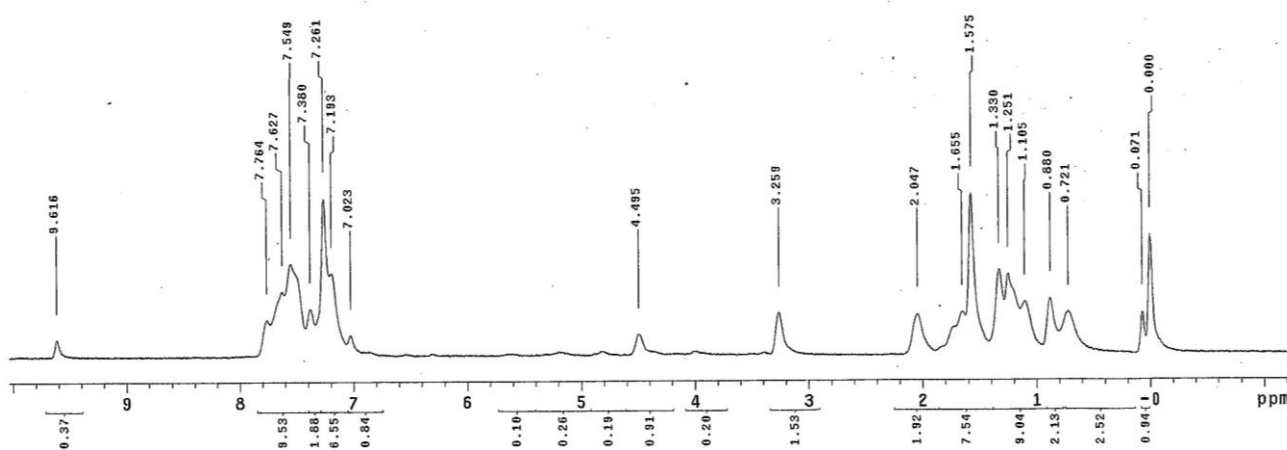

**Figure S8.**  $^1\text{H}$  NMR spectrum of PA1

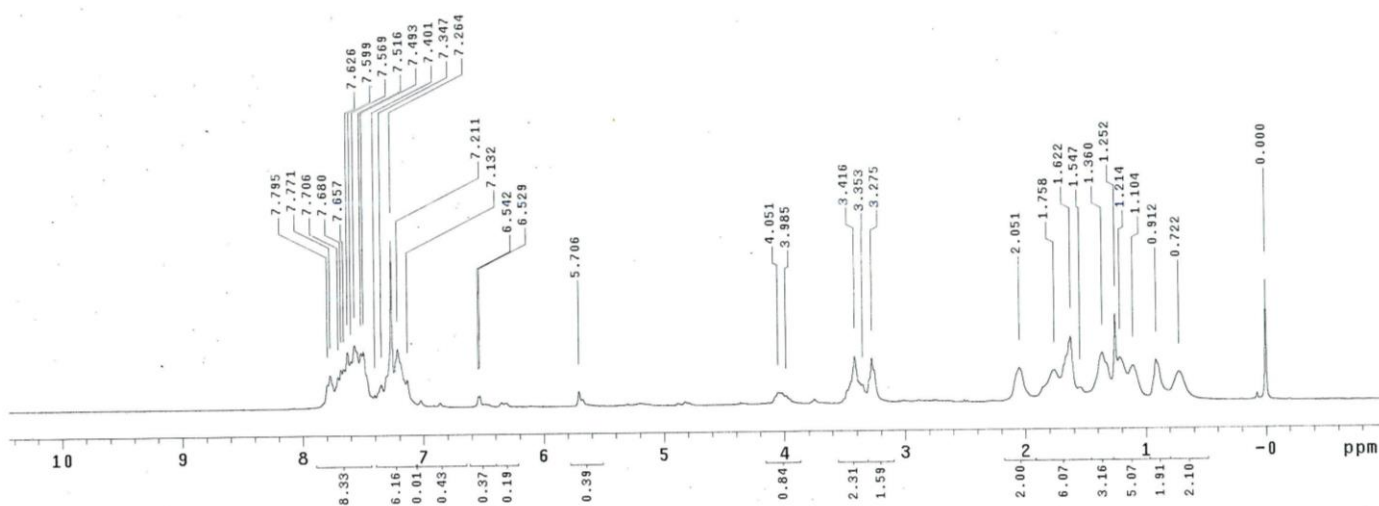

**Figure S9.** <sup>1</sup>H NMR spectrum of PDT

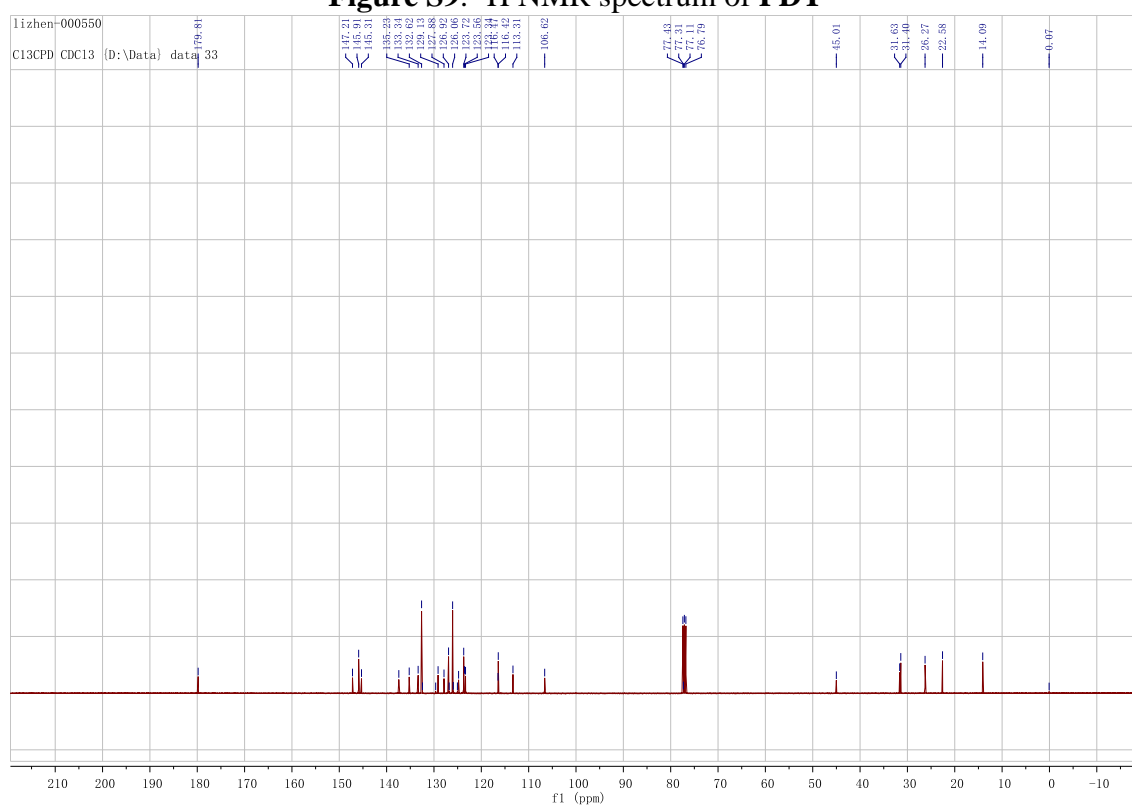

**Figure S10.** <sup>13</sup>C NMR spectrum of compound 2
